# Supplementary material for: Synthesis of novel bioactive pyrido[2,3- d ]pyrimidine derivatives with potent cytotoxicity through apoptosis as PIM-1 kinase inhibitors
Source: Royal Society of Chemistry journal article supplement (doi:10.1039/d4ra00902a), 2024-01-01
Supplement: d4ra00902a1.pdf [file d4ra00902a1.pdf]

## Spectral Analysis

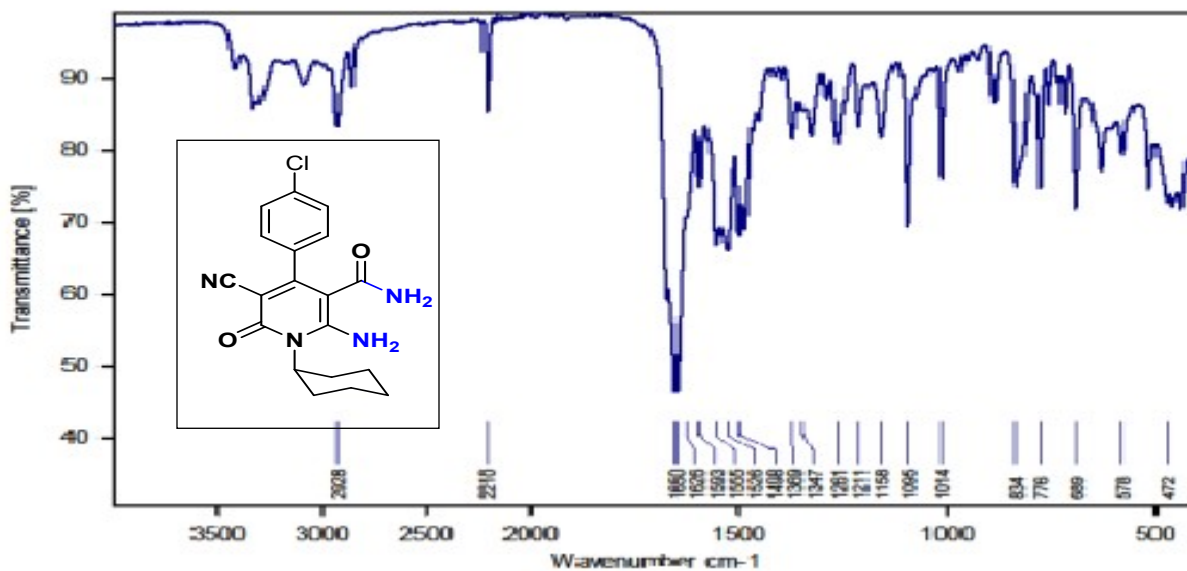

Fig. (1): IR spectrum of compound 2.

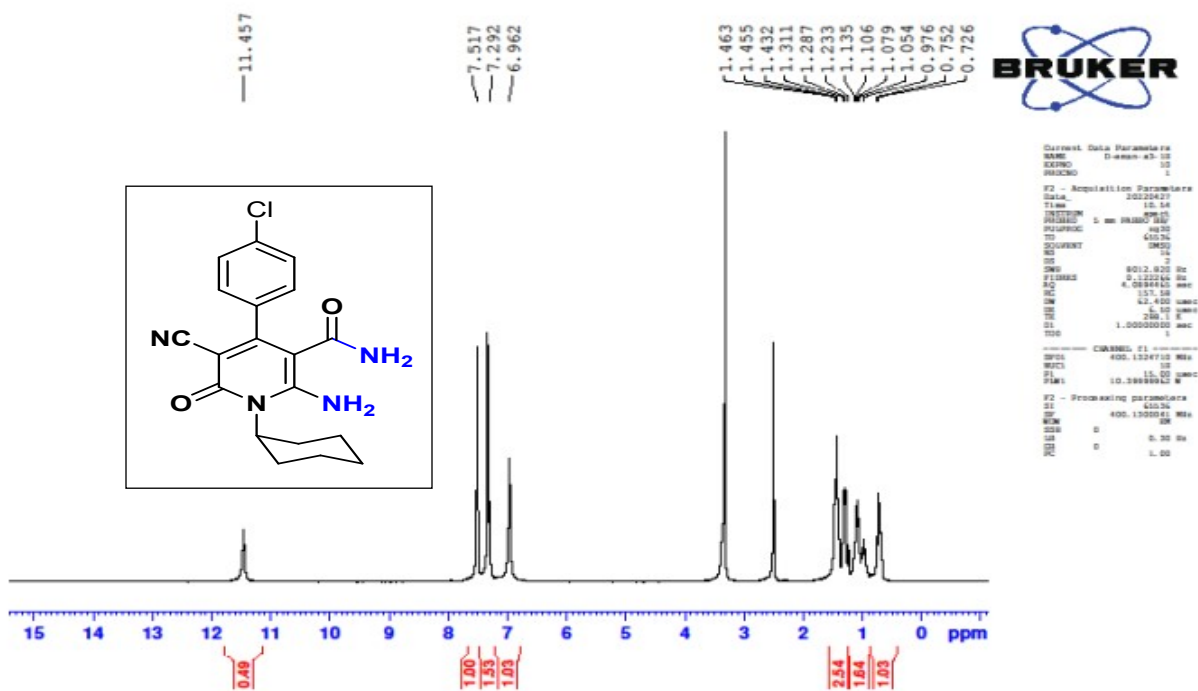

Fig. (2): <sup>1</sup>H NMR spectrum of compound 2.

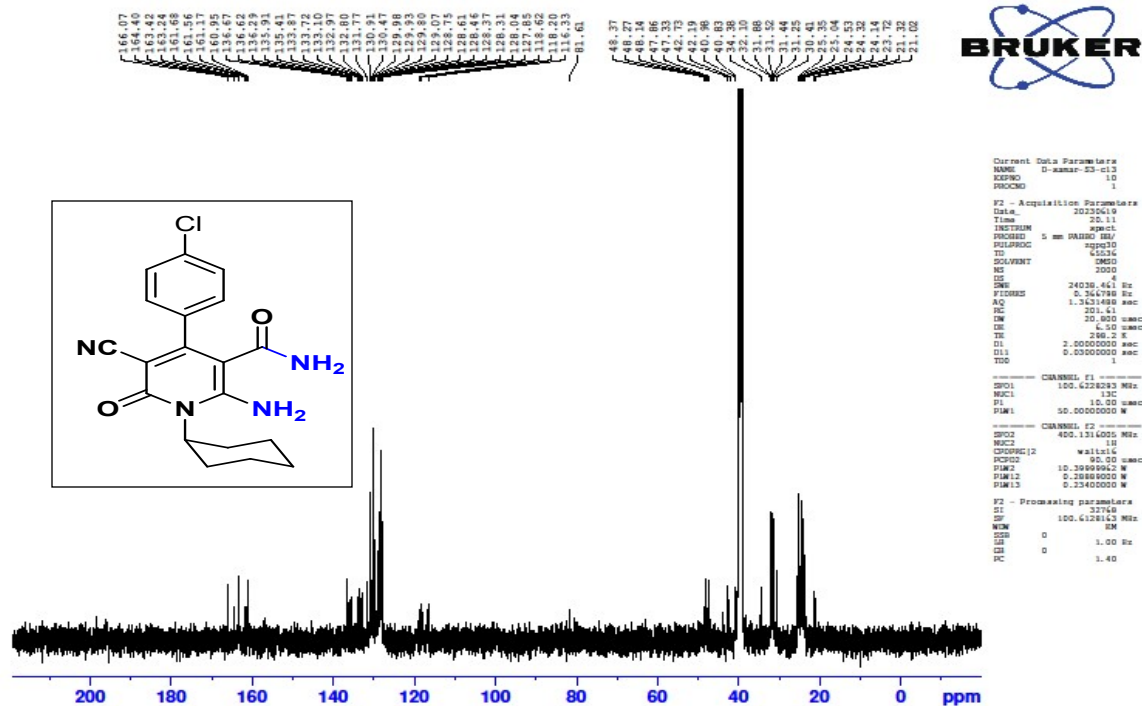

Fig. (3):  $^{13}\text{C}$  NMR spectrum of compound 2.

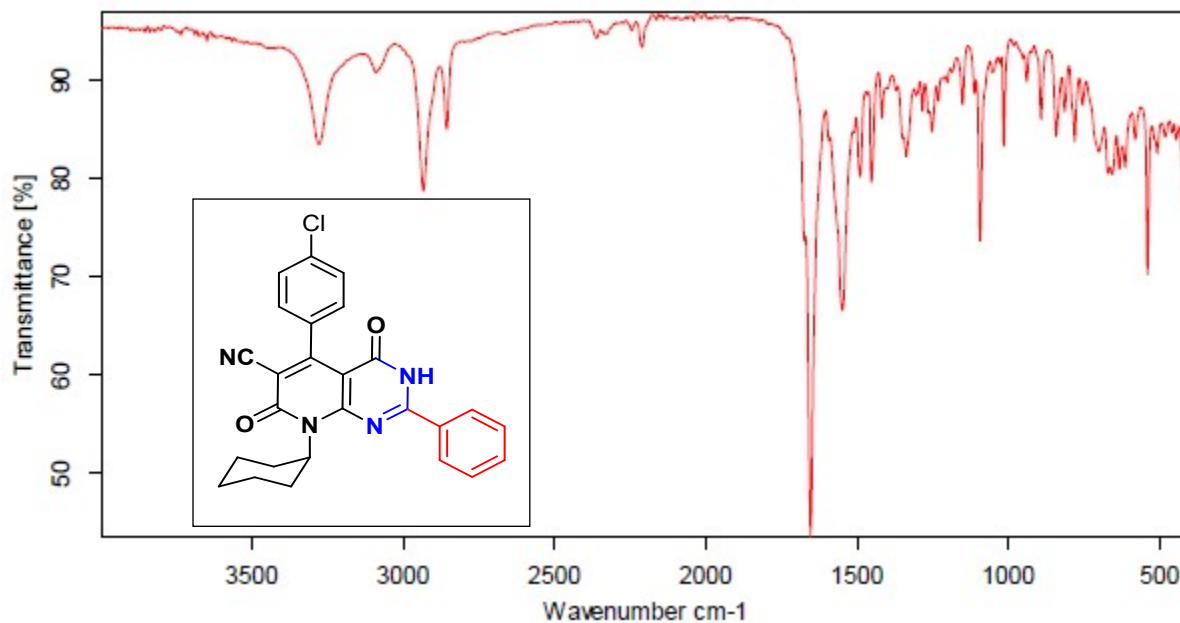

Fig. (4): IR spectrum of compound 3.

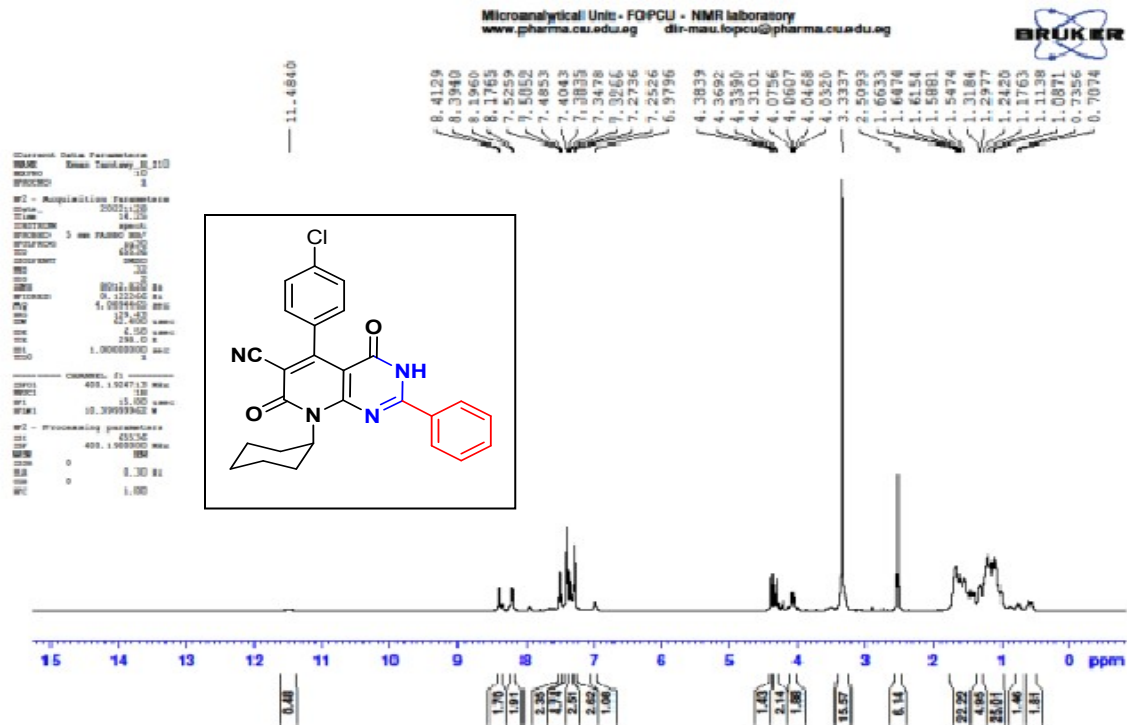

Fig. (5): <sup>1</sup>H NMR spectrum of compound 3.

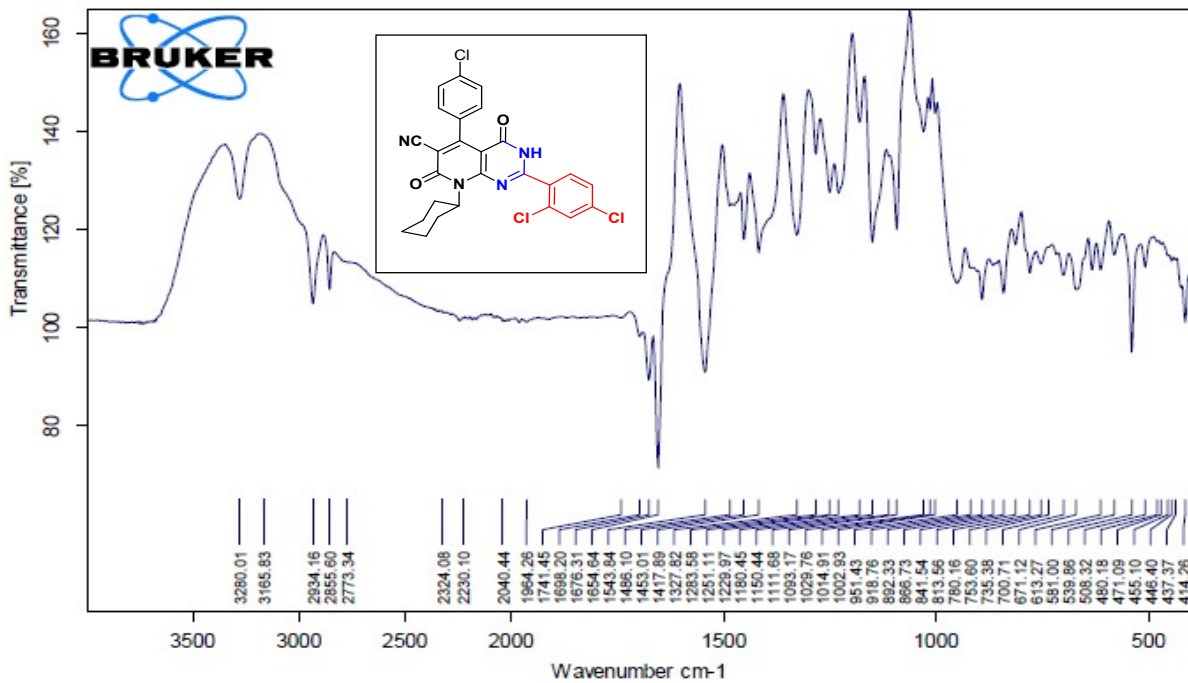

Fig. (6): IR spectrum of compound 4.

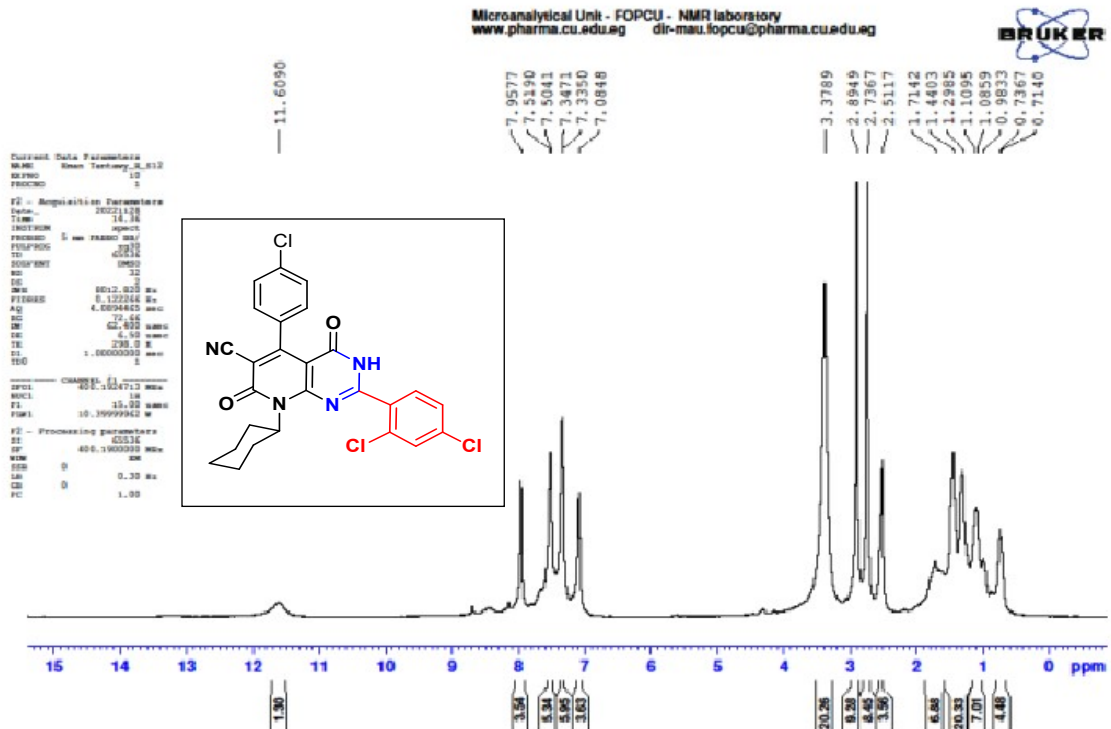

Fig. (7): <sup>1</sup>H NMR spectrum of compound 4.

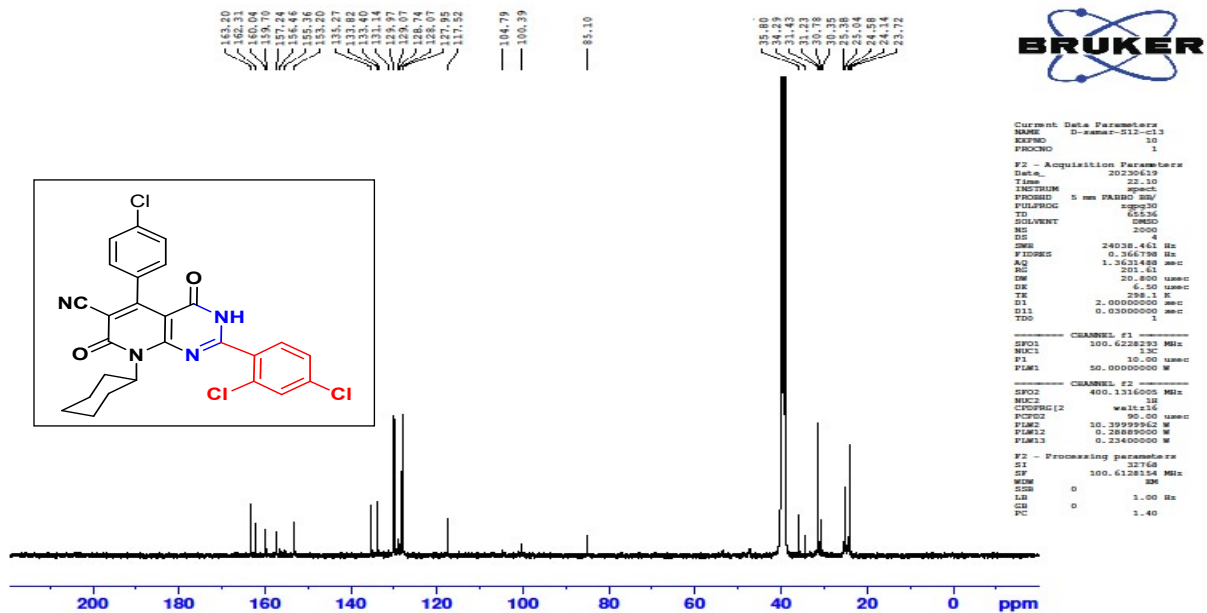

Fig. (8): <sup>13</sup>C NMR spectrum of compound 4.

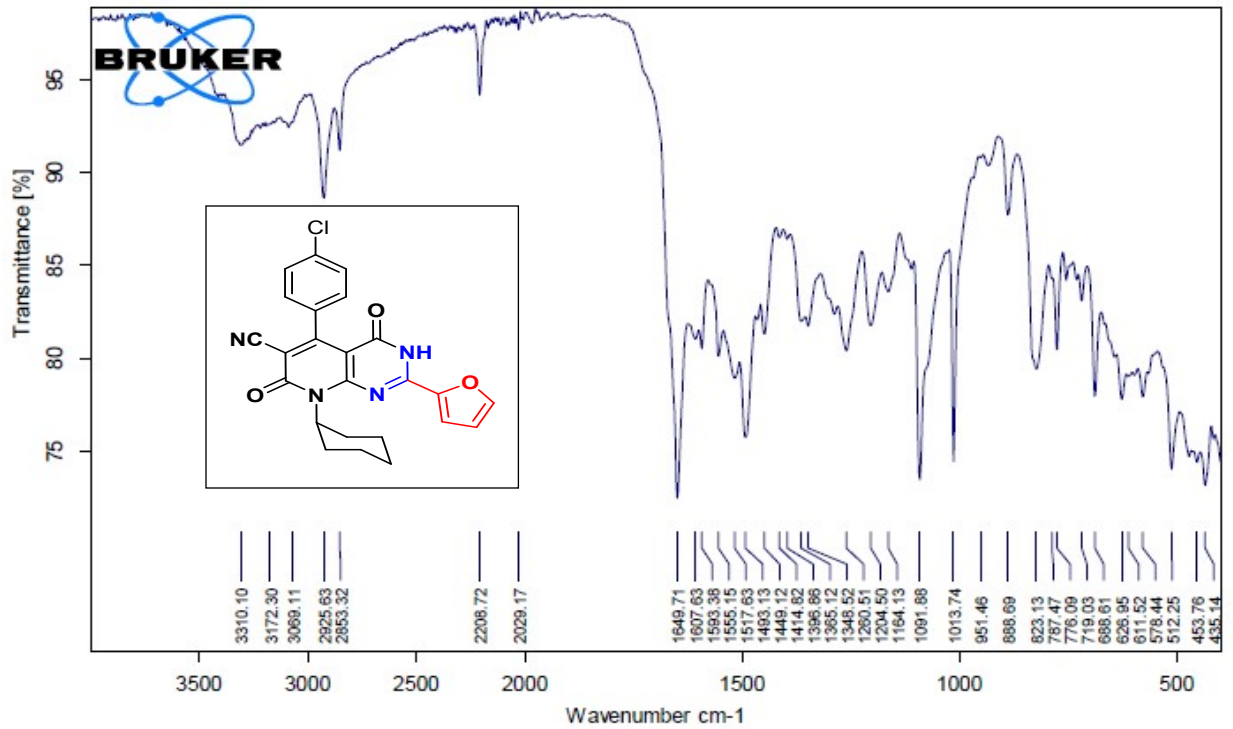

Fig. (9): IR spectrum of compound 5.

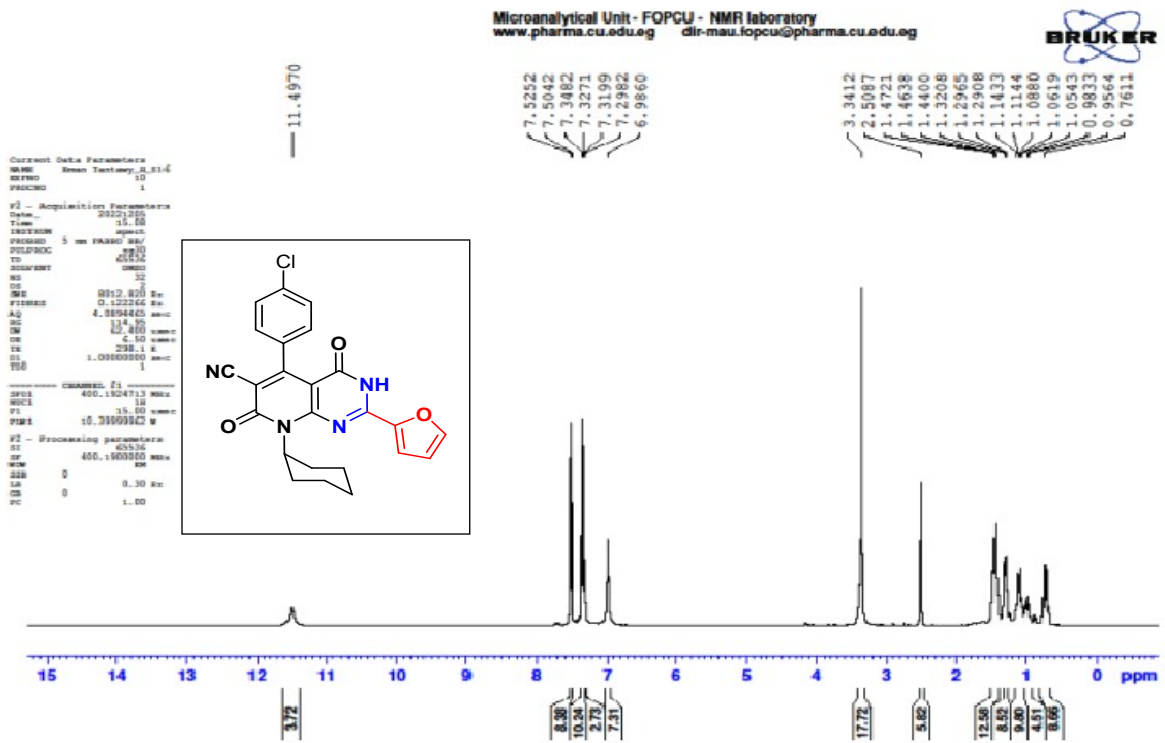

Fig. (10): <sup>1</sup>H NMR spectrum of compound 5.

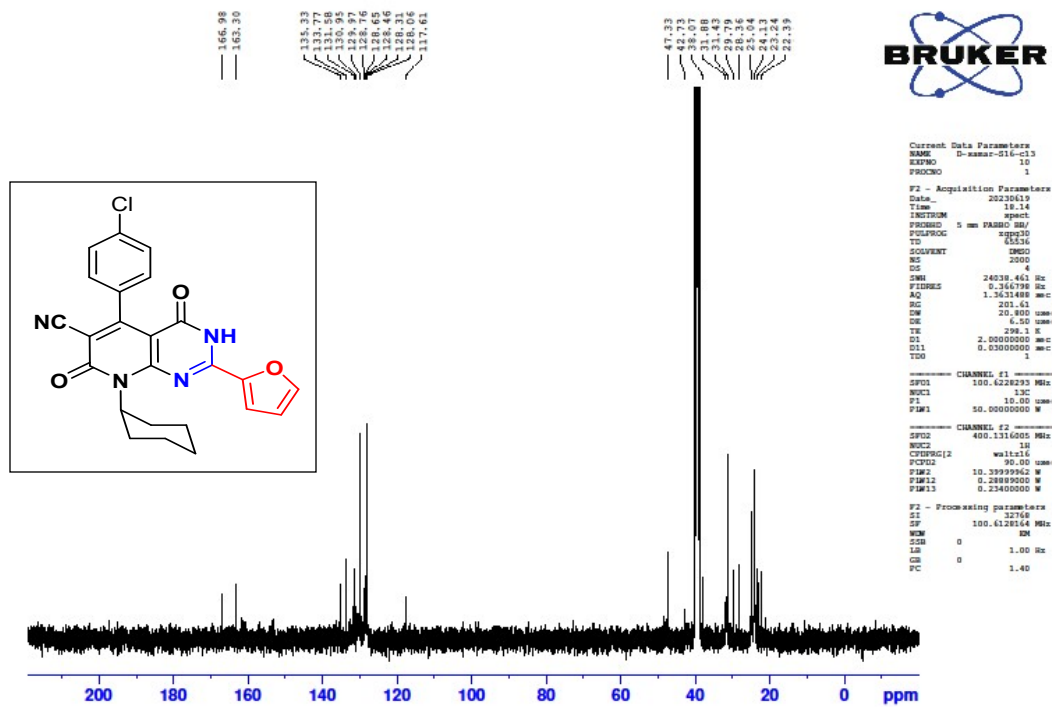

Fig. (11): <sup>13</sup>C NMR spectrum of compound 5.

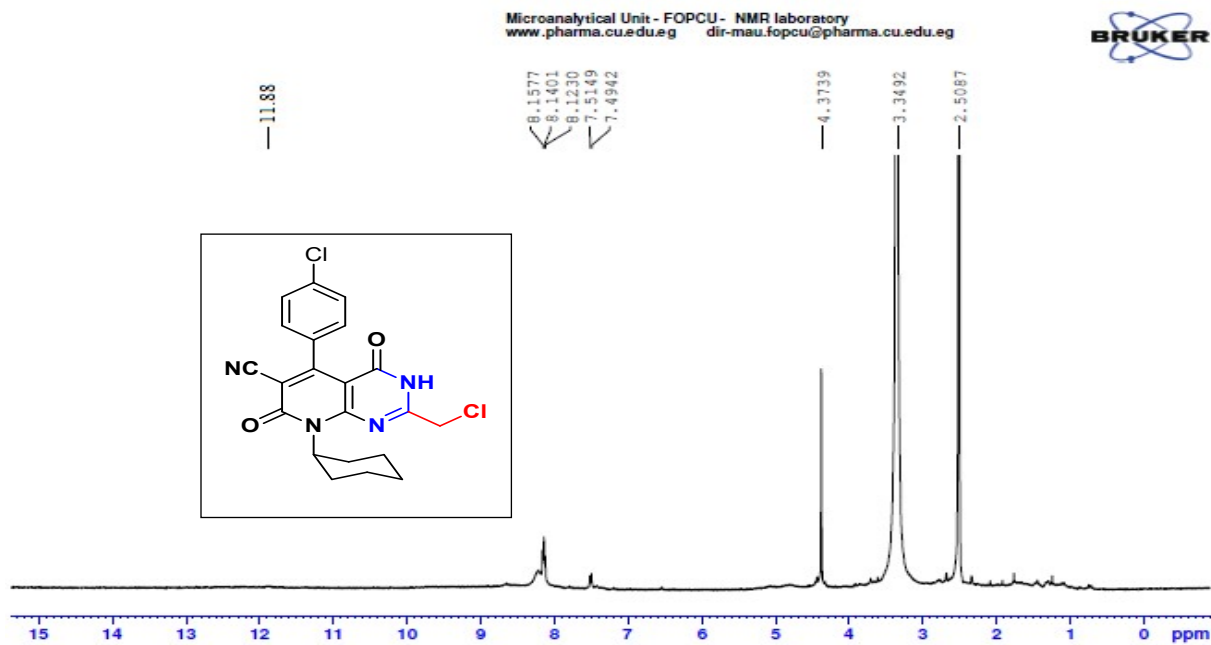

Fig. (12): <sup>1</sup>H NMR spectrum of compound 6.

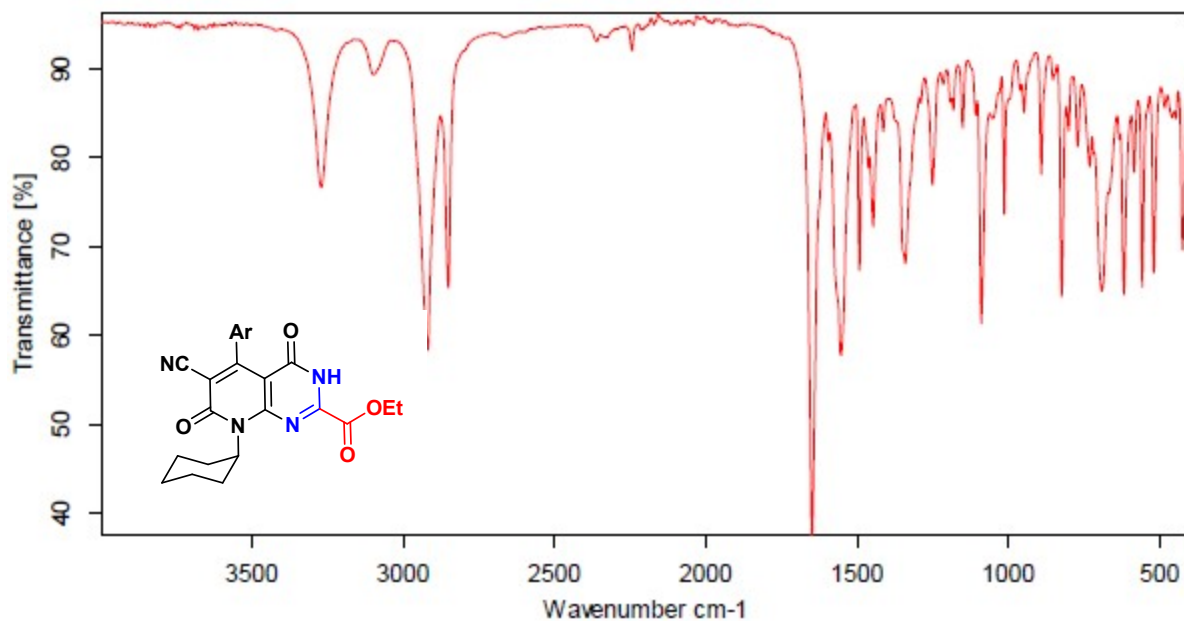

Fig. (13): IR spectrum of compound 7.

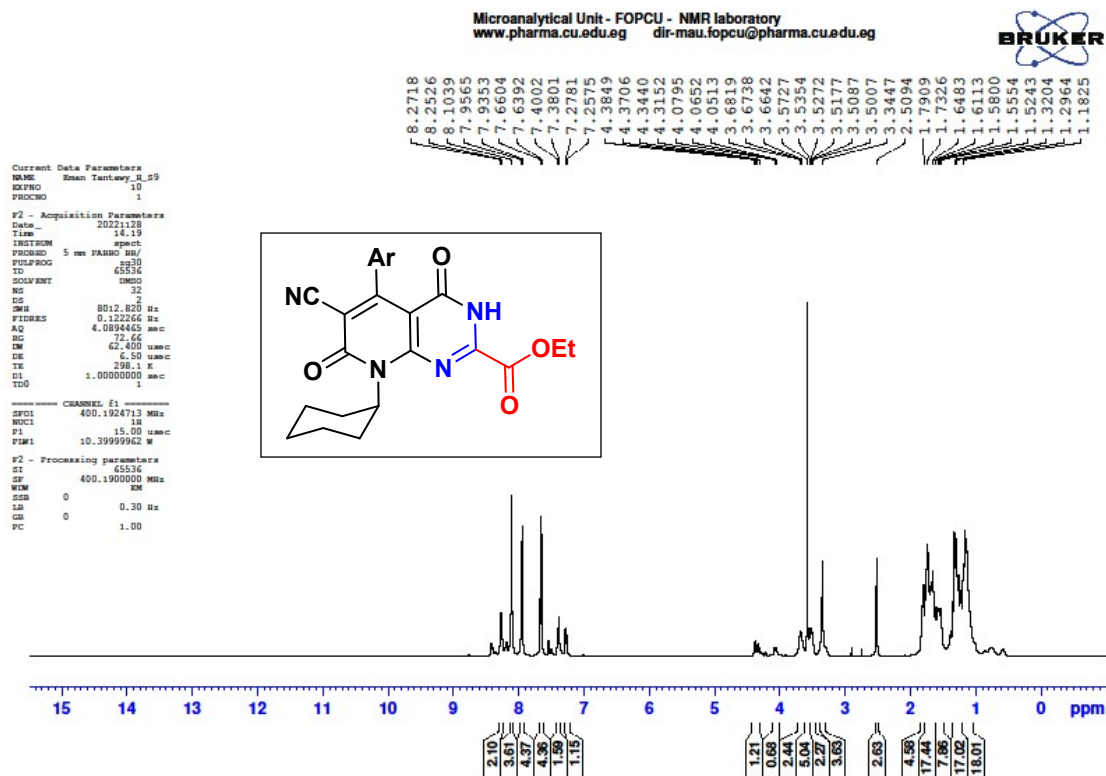

Fig. (14): <sup>1</sup>H NMR spectrum of compound 7.

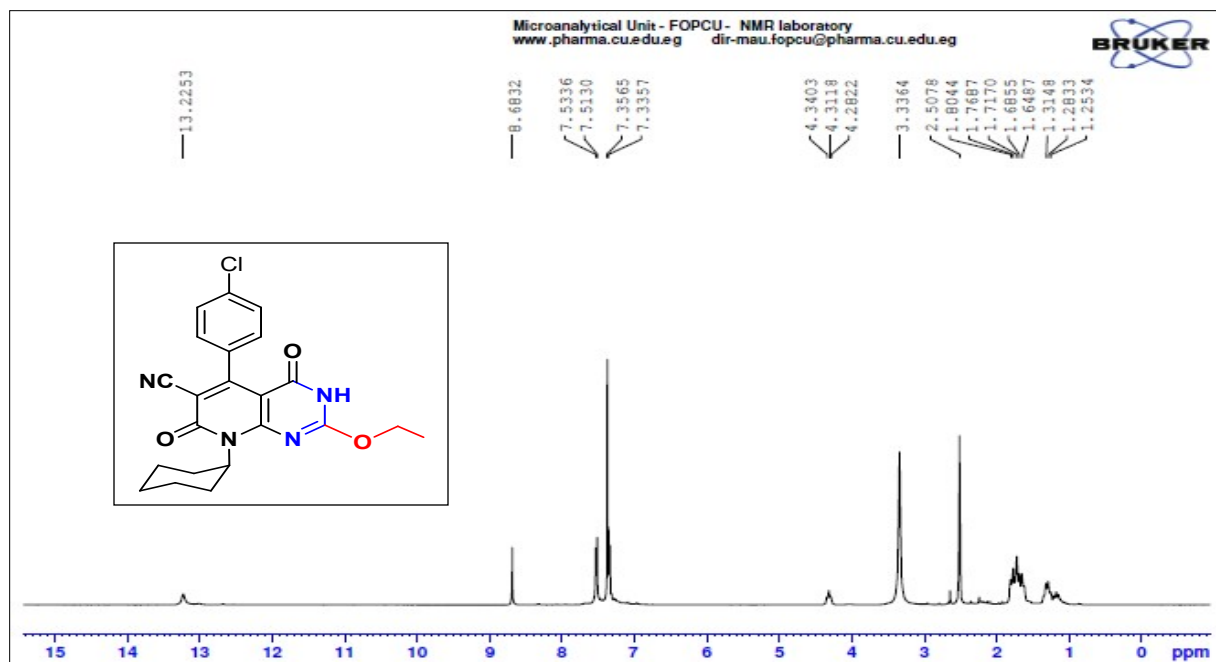

Fig. (15):  $^1\text{H}$  NMR spectrum of compound 8.

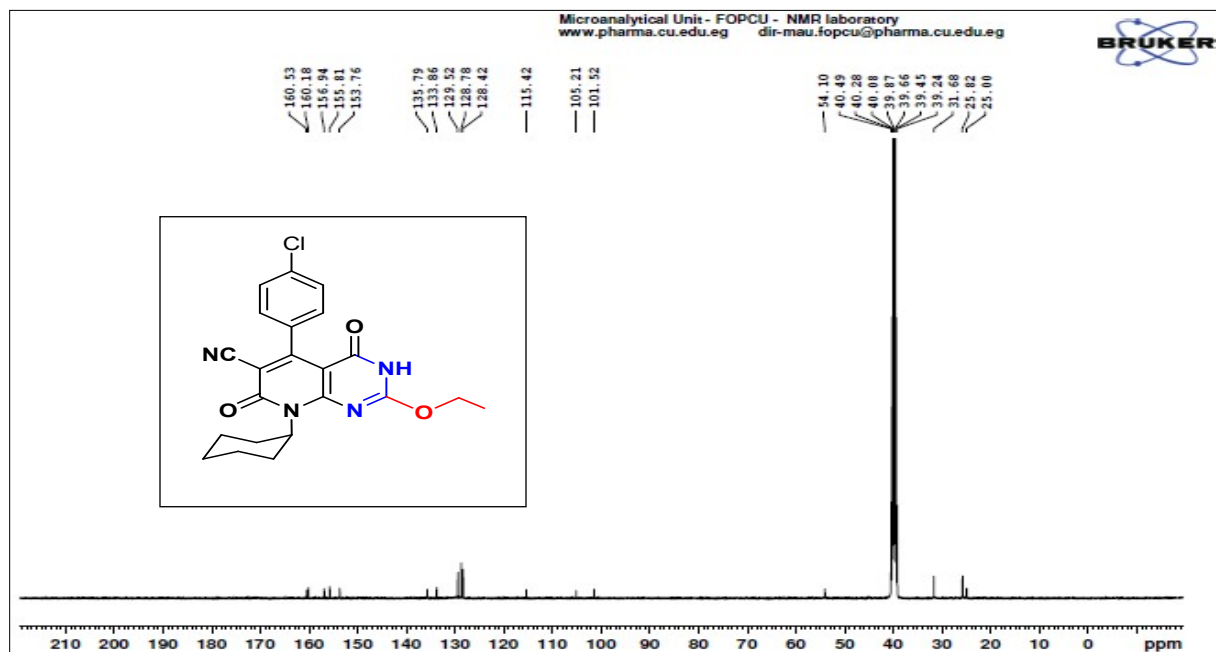

Fig. (16):  $^{13}\text{C}$  NMR spectrum of compound 8.



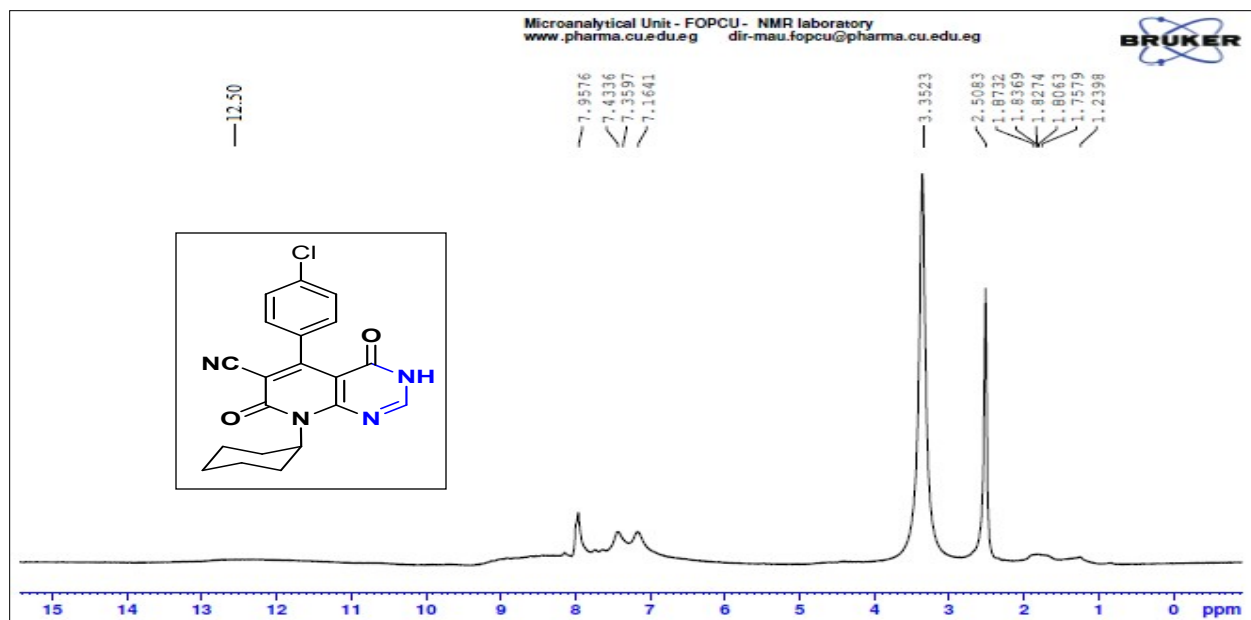

Fig. (17):  $^1\text{H}$  NMR spectrum of compound 9.

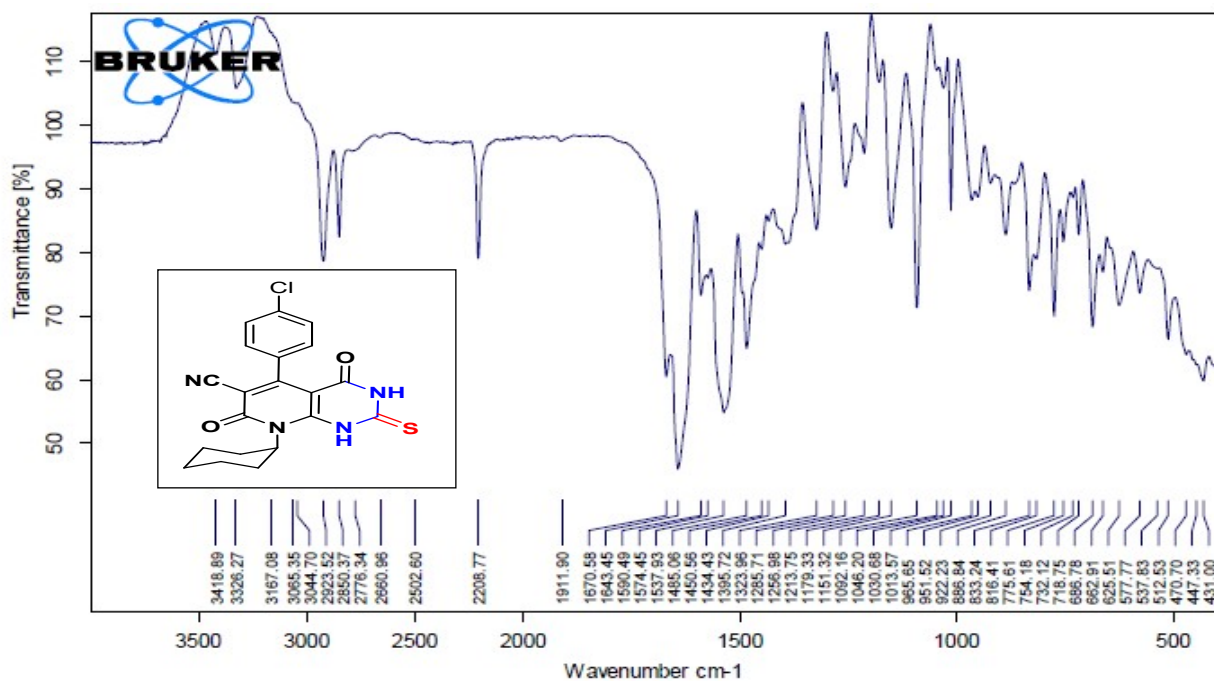

Fig. (18): IR spectrum of compound 10.

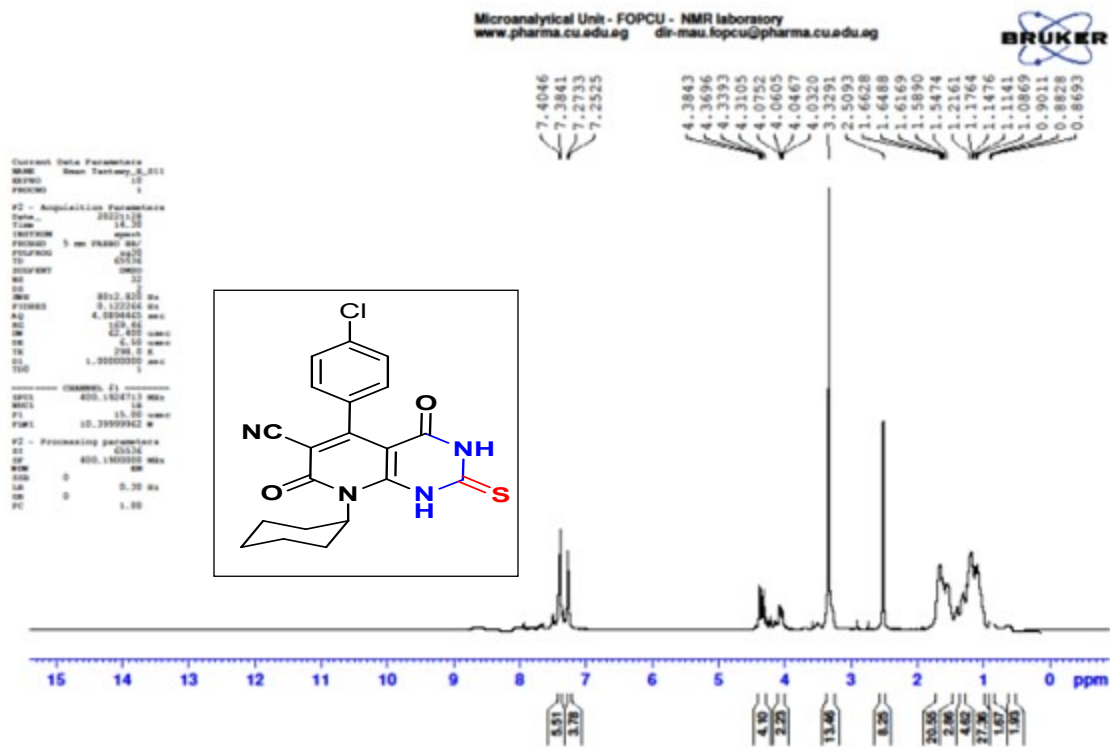

Fig. (19): <sup>1</sup>H NMR spectrum of compound 10

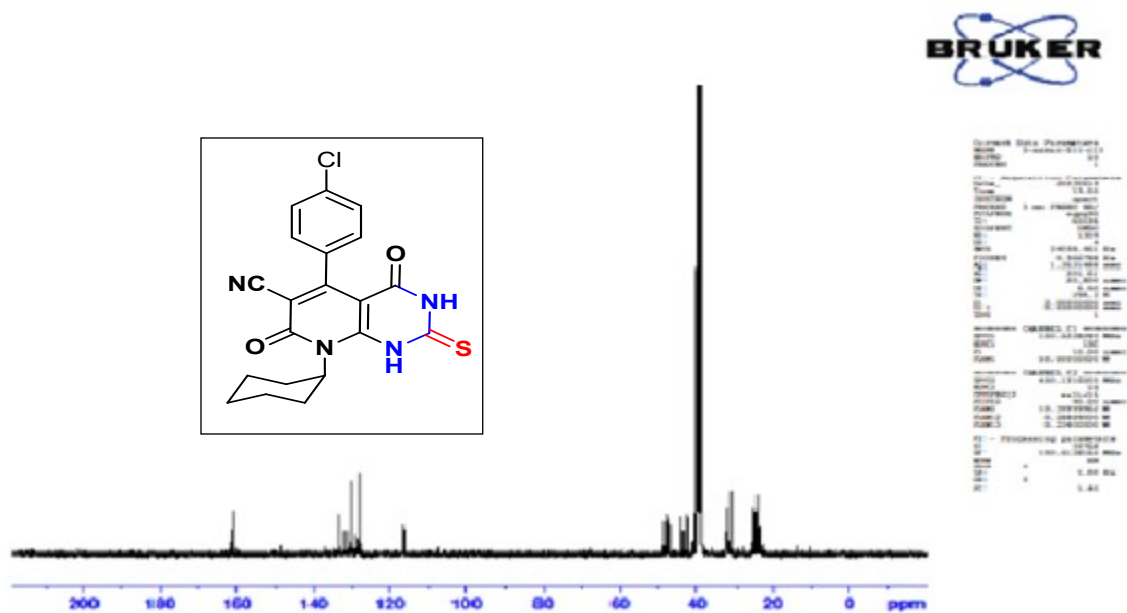

Fig. (19): <sup>13</sup>C NMR spectrum of compound 10.

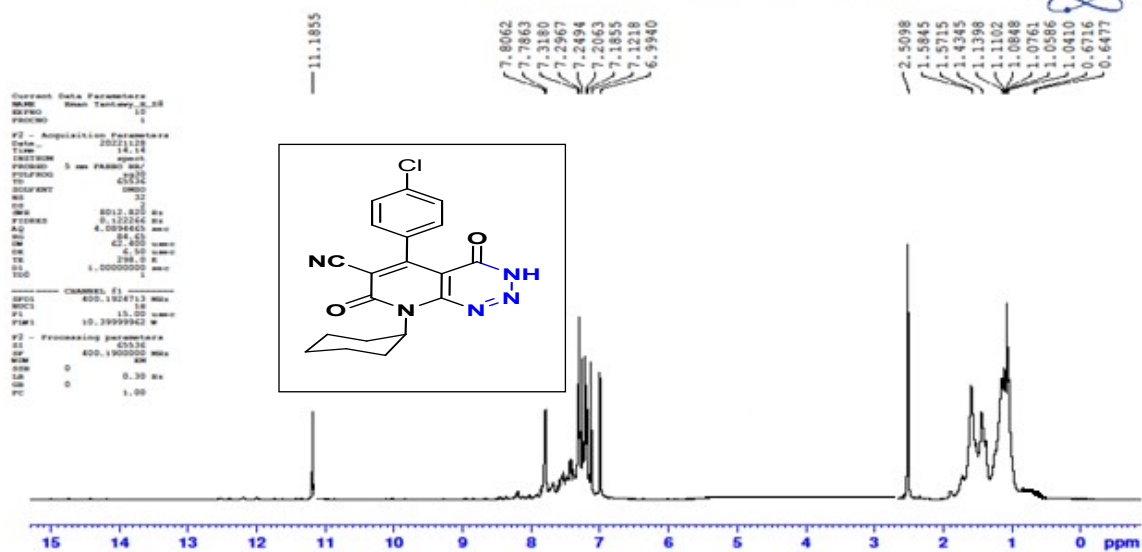

Fig. (20): <sup>1</sup>H NMR spectrum of compound 11.
